# Supplementary material
Source: PubMed Central journal article supplement (PMC9630142)

# THE LANCET

## Infectious Diseases

### Supplementary appendix

This appendix formed part of the original submission and has been peer reviewed. We post it as supplied by the authors.

Supplement to: Sheikh A, Kerr S, Woolhouse M, et al. Severity of omicron variant of concern and effectiveness of vaccine boosters against symptomatic disease in Scotland (EAVE II): a national cohort study with nested test-negative design. *Lancet Infect Dis* 2022; published online April 22. [https://doi.org/10.1016/S1473-3099\(22\)00141-4](https://doi.org/10.1016/S1473-3099(22)00141-4).

## Supplementary materials

**Table S1: Characteristics of those testing positive by S gene status**

| Characteristic | Levels                | S Positive     | S Negative     | Weak S Positive | Other         | Unknown       |               |
|----------------|-----------------------|----------------|----------------|-----------------|---------------|---------------|---------------|
| Total          |                       | 126,511        | 23,840         | 2,385           | 1,081         | 9,129         |               |
| Sex            | Female                | 65,128 (51.5%) | 12,805 (53.7%) | 1,355 (56.8%)   | 553 (51.2%)   | 4,659 (51.0%) |               |
|                | Male                  | 61,383 (48.5%) | 11,035 (46.3%) | 1,030 (43.2%)   | 528 (48.8%)   | 4,470 (49.0%) |               |
| Age group      | 0-11                  | 29,329 (23.2%) | 1,389 (5.8%)   | 500 (21.0%)     | 253 (23.4%)   | 1,238 (13.6%) |               |
|                | 12-19                 | 14,665 (11.6%) | 2,277 (9.6%)   | 253 (10.6%)     | 126 (11.7%)   | 549 (6.0%)    |               |
|                | 20-39                 | 32,628 (25.8%) | 11,732 (49.2%) | 879 (36.9%)     | 352 (32.6%)   | 2,037 (22.3%) |               |
|                | 40-59                 | 39,528 (31.2%) | 6,862 (28.8%)  | 609 (25.5%)     | 278 (25.7%)   | 2,535 (27.8%) |               |
|                | 60-74                 | 9,101 (7.2%)   | 1,354 (5.7%)   | 126 (5.3%)      | 66 (6.1%)     | 1,401 (15.3%) |               |
|                | 75+                   | 1,260 (1.0%)   | 226 (0.9%)     | 18 (0.8%)       | 6 (0.6%)      | 1,369 (15.0%) |               |
|                | Number of risk groups | 0              | 86,753 (68.6%) | 15,888 (66.6%)  | 1,634 (68.5%) | 736 (68.1%)   | 4,553 (49.9%) |
|                |                       | 1              | 25,341 (20.0%) | 5,206 (21.8%)   | 457 (19.2%)   | 208 (19.2%)   | 1,911 (20.9%) |
|                | 2                     | 5,410 (4.3%)   | 888 (3.7%)     | 91 (3.8%)       | 34 (3.1%)     | 863 (9.5%)    |               |
|                | 3                     | 1,206 (1.0%)   | 170 (0.7%)     | 12 (0.5%)       | 10 (0.9%)     | 456 (5.0%)    |               |
|                | 4                     | 352 (0.3%)     | 39 (0.2%)      | 5 (0.2%)        | * (0.1%)      | 256 (2.8%)    |               |
|                | 5+                    | 151 (0.1%)     | 23 (0.1%)      | * (0.0%)        | * (0.1%)      | 216 (2.4%)    |               |
|                | Unknown               | 7,298 (5.8%)   | 1,626 (6.8%)   | 185 (7.8%)      | 91 (8.4%)     | 874 (9.6%)    |               |
| Vaccine status | Unvaccinated          | 47,972 (37.9%) | 3,548 (14.9%)  | 712 (29.9%)     | 408 (37.7%)   | 2,749 (30.1%) |               |

|                            |              |               |                 |                |               |               |               |       |  |  |
|----------------------------|--------------|---------------|-----------------|----------------|---------------|---------------|---------------|-------|--|--|
|                            | First dose   | 0-27 days     |                 | 123            |               |               |               |       |  |  |
|                            |              | 28+ weeks     | 965 (0.8%)      | (0.5%)         | 18 (0.8%)     | 8 (0.7%)      | 54 (0.6%)     |       |  |  |
|                            | Second dose  | 0-13 days     |                 | 88             |               |               |               |       |  |  |
|                            |              | 14-41 days    | 311 (0.2%)      | (0.4%)         | 13 (0.5%)     | 5 (0.5%)      | 25 (0.3%)     |       |  |  |
|                            |              | 42-69 days    |                 | 127            |               |               |               |       |  |  |
|                            |              | 70+ days      | 219 (0.2%)      | (0.5%)         | 15 (0.6%)     | 7 (0.6%)      | 23 (0.3%)     |       |  |  |
|                            | Third dose   | 0-13 days     |                 | 258            |               |               |               |       |  |  |
|                            |              | 14+days       | 728 (0.6%)      | (1.1%)         | 28 (1.2%)     | 6 (0.6%)      | 37 (0.4%)     |       |  |  |
|                            |              |               |                 | 12,612         |               |               |               | 3,816 |  |  |
|                            |              |               | 56,099 (44.3%)  | (52.9%)        | 943 (39.5%)   | 435 (40.2%)   | (41.8%)       |       |  |  |
|                            |              |               | 2,364           |                |               |               |               |       |  |  |
|                            |              | 6,351 (5.0%)  | (9.9%)          | 188 (7.9%)     | 58 (5.4%)     | 664 (7.3%)    |               |       |  |  |
|                            |              |               | 3,260           |                |               |               | 1,233         |       |  |  |
|                            |              | 4,543 (3.6%)  | (13.7%)         | 323 (13.5%)    | 65 (6.0%)     | (13.5%)       |               |       |  |  |
| Previously tested positive | Never before |               | 125,064 (98.9%) | 21,949 (92.1%) | 2,123 (89.0%) | 1,034 (95.7%) | 8,285 (90.8%) |       |  |  |
|                            |              | 1 to 28 days  | 292 (0.2%)      | 0 (0.0%)       | * (0.2%)      | * (0.4%)      | 375 (4.1%)    |       |  |  |
|                            |              | 29 to 90 days | 207 (0.2%)      | 91 (0.4%)      | 39 (1.6%)     | 10 (0.9%)     | 249 (2.7%)    |       |  |  |
|                            |              | > 90 days     | 948 (0.7%)      | 1,800 (7.6%)   | 219 (9.2%)    | 33 (3.1%)     | 220 (2.4%)    |       |  |  |

The numbers in some cells are suppressed to avoid counts of less than 5, denoted \*.

Number of risk groups is derived from the QCOVID algorithm categories. The individuals whose comorbid status is unknown are those who did not link into the EAVE II study. This can occur if a person recently moved into Scotland or was not registered with a GP practice in December 2020,

The majority of individuals whose S gene status is unknown tested positive in an NHS laboratory and S Gene status is not routinely available. They are included for completeness but are not used in any of the modelling analysis.

**Table S2: Number of samples with S gene status by sequencing variant**

| <b>S gene status</b>   | <b>Delta</b> | <b>Omicron</b> | <b>Other</b> | <b>Not sequenced</b> | <b>Total</b> |
|------------------------|--------------|----------------|--------------|----------------------|--------------|
| <b>S gene positive</b> | 22,616       | 1              | 23           | 103,871              | 126,511      |
| <b>S gene negative</b> | 10           | 686            | 5            | 23,139               | 2,3840       |
| <b>Weak S positive</b> |              | 0              | 0            | 2,381                | 2,385        |
| <b>Other</b>           | 11           | 0              | 0            | 1,070                | 1,081        |
| <b>Unknown</b>         | 2,819        | 18             | 17           | 6,275                | 9,129        |
| <b>Total</b>           | 25,460       | 705            | 45           | 136,736              | 162,946      |

The information in this table is based upon sequencing information available up to December 11, 2021. The majority of individuals whose S gene status is unknown tested positive in an NHS laboratory and S gene status is not routinely available. A greater proportion of NHS laboratory cases are sequenced compared to community cases. Some cells have small numbers of admissions and these have been suppressed (\*) as well as the expected values.

**Table S3: Numbers, percentages and hazard ratios for each characteristic included in the Cox regression model**

| Characteristic                 | Levels   | S positive        | Hospitalised   | HR (95% CI)              | S negative        |
|--------------------------------|----------|-------------------|----------------|--------------------------|-------------------|
| Week                           | 1        | 17,030<br>(14.3%) | 174<br>(20.3%) | 1                        | 10 (0.0%)         |
|                                | 2        | 18,902<br>(15.9%) | 173<br>(20.2%) | 0.98<br>(0.79 – 1.21)    | 5 (0.0%)          |
|                                | 3        | 18,056<br>(15.2%) | 141<br>(16.5%) | 0.86<br>(0.68 – 1.07)    | 8 (0.0%)          |
|                                | 4        | 15,587<br>(13.1%) | 112<br>(13.1%) | 0.83<br>(0.65 – 1.05)    | 73 (0.3%)         |
|                                | 5        | 17,055<br>(14.3%) | 141<br>(16.5%) | 0.99<br>(0.79 – 1.24)    | 436 (2.0%)        |
|                                | 6        | 18,181<br>(15.3%) | 91<br>(10.6%)  | 0.67<br>(0.52 – 0.87)    | 4,450<br>(20.0%)  |
|                                | 7        | 14,289<br>(12.0%) | 24<br>(2.8%)   | 0.43<br>(0.28 – 0.67)    | 17,223<br>(77.6%) |
| Age                            | 0-11     | 27,282<br>(22.9%) | 36<br>(4.2%)   | 1                        | 1,244<br>(5.6%)   |
|                                | 12-19    | 13,906<br>(11.7%) | 15<br>(1.8%)   | 1.14<br>(0.62 – 2.11)    | 2,140<br>(9.6%)   |
|                                | 20-39    | 30,410<br>(25.5%) | 193<br>(22.5%) | 9.12<br>(6.32 – 13.18)   | 10,801<br>(48.6%) |
|                                | 40-59    | 37,625<br>(31.6%) | 382<br>(44.6%) | 16.72<br>(11.53 – 24.25) | 6,501<br>(29.3%)  |
|                                | 60-74    | 8,695<br>(7.3%)   | 181<br>(21.1%) | 28.67<br>(19.22 – 42.75) | 1,302<br>(5.9%)   |
|                                | 75+      | 1,182<br>(1.0%)   | 49<br>(5.7%)   | 38.56<br>(23.43 – 63.48) | 217<br>(1.0%)     |
| Sex                            | Female   | 61,556<br>(51.7%) | 429<br>(50.1%) | 1                        | 11,997<br>(54.0%) |
|                                | Male     | 57,544<br>(48.3%) | 427<br>(49.9%) | 1.07<br>(0.93 – 1.22)    | 10,208<br>(46.0%) |
| Deprivation                    | 1 - High | 21,995<br>(18.5%) | 228<br>(26.6%) | 1                        | 3,811<br>(17.2%)  |
|                                | 2        | 23,188<br>(19.5%) | 194<br>(22.7%) | 0.87<br>(0.72 – 1.05)    | 3,993<br>(18.0%)  |
|                                | 3        | 22,537<br>(18.9%) | 166<br>(19.4%) | 0.80<br>(0.65 – 0.98)    | 3,862<br>(17.4%)  |
|                                | 4        | 24,687<br>(20.7%) | 141<br>(16.5%) | 0.67<br>(0.54 – 0.83)    | 4,654<br>(21.0%)  |
|                                | 5-Low    | 25,892<br>(21.7%) | 124<br>(14.5%) | 0.62<br>(0.50 – 0.78)    | 5,688<br>(25.6%)  |
| Number of co-morbid conditions | 0        | 86,717<br>(72.8%) | 364<br>(42.5%) | 1                        | 15,884<br>(71.5%) |
|                                | 1        | 25,304<br>(21.2%) | 272<br>(31.8%) | 1.90<br>(1.62 – 2.23)    | 5,204<br>(23.4%)  |
|                                | 2        | 5,398<br>(4.5%)   | 130<br>(15.2%) | 3.41<br>(2.77 – 4.20)    | 886<br>(4.0%)     |
|                                | 3        | 1,193             | 56             | 5.45                     | 170               |

|                                           |                        |                      |                    |                        |                       |                   |
|-------------------------------------------|------------------------|----------------------|--------------------|------------------------|-----------------------|-------------------|
|                                           |                        | (1.0%)               | (6.5%)             | (4.05 – 7.32)          | (0.8%)                |                   |
|                                           | 4                      | 346<br>(0.3%)        | 22<br>(2.6%)       | 6.17<br>(3.93 – 9.70)  | 39<br>(0.2%)          |                   |
|                                           | 5+                     | 142<br>(0.1%)        | 12<br>(1.4%)       | 7.12<br>(3.91 – 12.98) | 22<br>(0.1%)          |                   |
| Vaccine status and type for first 2 doses | uv                     | 44,091<br>(37.0%)    | 264<br>(30.8%)     | 1                      | 2,944<br>(13.3%)      |                   |
|                                           | v1_4+_AZ               | 798<br>(0.7%)        | 10<br>(1.2%)       | 0.36<br>(0.19 – 0.68)  | 80<br>(0.4%)          |                   |
|                                           | v2_6-9_AZ              | 122<br>(0.1%)        | *                  | 0.24<br>(0.03 – 1.69)  | 14<br>(0.1%)          |                   |
|                                           | v2_10+_AZ              | 32,703<br>(27.5%)    | 362 (42.3%)        | 0.32<br>(0.27 – 0.39)  | 3,668<br>(16.5%)      |                   |
|                                           | v3_0:1_AZ              | 4,596<br>(3.9%)      | 46<br>(5.4%)       | 0.21<br>(0.15 – 0.30)  | 1,584<br>(7.1%)       |                   |
|                                           | v3_2+_AZ               | 1,717<br>(1.4%)      | 44<br>(5.1%)       | 0.39<br>(0.27 – 0.56)  | 1,460<br>(6.6%)       |                   |
|                                           | v1_4+_Mo               | 352<br>(0.3%)        | 0<br>(0%)          | 0.00<br>(0.00 – Inf)   | 105<br>(0.5%)         |                   |
|                                           | v2_6-9_Mo              | 126<br>(0.1%)        | *                  | 0.43<br>(0.06 – 3.08)  | 44<br>(0.2%)          |                   |
|                                           | v2_10+_Mo              | 1,649<br>(1.4%)      | *                  | 0.04<br>(0.01 – 0.29)  | 1,382<br>(6.2%)       |                   |
|                                           | v1_0:3_PB              | 839<br>(0.7%)        | *                  | 0.53<br>(0.17 – 1.65)  | 84<br>(0.4%)          |                   |
|                                           | v1_4+_PB               | 7,655<br>(6.4%)      | 14<br>(1.6%)       | 0.33<br>(0.19 – 0.56)  | 1,172<br>(5.3%)       |                   |
|                                           | v2_0:1_PB              | 236<br>(0.2%)        | 0<br>(0.0%)        | 0.00<br>(0.00 – Inf)   | 72<br>(0.3%)          |                   |
|                                           | v2_2-5_PB              | 119<br>(0.1%)        | 0<br>(0.0%)        | 0.00<br>(0.00 – Inf)   | 90<br>(0.4%)          |                   |
|                                           | v2_6-9_PB              | 423<br>(0.4%)        | 0<br>(0.0%)        | 0.00<br>(0.00 – Inf)   | 176<br>(0.8%)         |                   |
|                                           | v2_10+_PB              | 19,293<br>(16.2%)    | 76<br>(8.9%)       | 0.18<br>(0.14 – 0.23)  | 6,930<br>(31.2%)      |                   |
|                                           | v3_0:1_PB              | 1,502<br>(1.3%)      | 7<br>(0.8%)        | 0.10<br>(0.05 – 0.21)  | 614<br>(2.8%)         |                   |
|                                           | v3_2+_PB               | 2,645<br>(2.2%)      | 26<br>(3.0%)       | 0.26<br>(0.17 – 0.40)  | 1,663<br>(7.5%)       |                   |
|                                           | Previous positive test | No previous positive | 117,724<br>(98.8%) | 852<br>(99.5%)         | 1                     | 20,398<br>(91.9%) |
|                                           |                        | 1-28 days prior      | 274<br>(0.2%)      | *                      | 0.51<br>(0.13 – 2.06) | 0<br>(0.0%)       |
|                                           |                        | 29-90 days prior     | 195<br>(0.2%)      | *                      | 0.66<br>(0.09 – 4.67) | 84<br>(0.4%)      |
|                                           |                        | 91+ days prior       | 907<br>(0.8%)      | *                      | 0.14<br>(0.02 – 1.02) | 1,723<br>(7.8%)   |

Total is the total number of individuals who tested positive with each type of infection (S positive or S negative) and Hospital are the numbers admitted to hospital from the community with a S positive infection. The percentages are column percentages and sum to 100 for each characteristic, and so can be used to compare the distribution of the levels of the characteristic in the total positive cases and in the hospitalised cases. HR is the hazard ratio of admission to hospital and LCL/UCL and the lower and upper 95% confidence intervals. Hospital information is not shown for S Negative infections as the numbers are too small. The numbers in some cells have been suppressed where they are below 5 (\*). Some rows of the vaccine type and status variable were omitted where there were less than 100 observations and no events – v1\_0:3\_AZ and 3 rows for Moderna.

**Figure S1: Rate of S-gene positive and S-gene negative confirmed infections from community samples in Scotland from November 15 to December 19, 2021 by vaccine status**

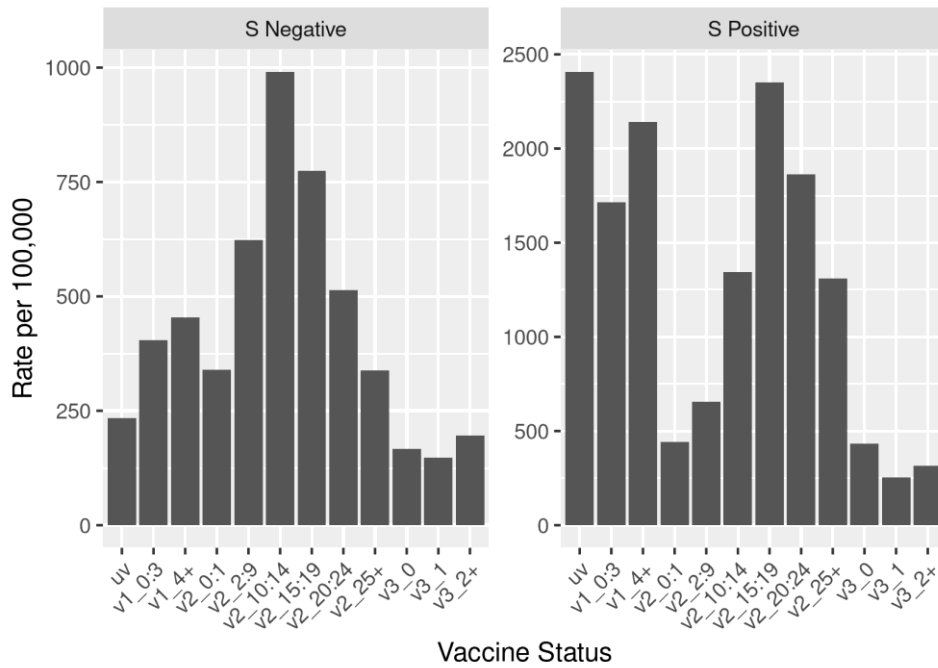

The above chart shows that the pattern of tested positive S negative infections is not the same as for S positive infections. In particular, for S positive the rate is high among the unvaccinated and low among those who have had their third/booster or who have recently received their second dose. S negative infections show high rates among those who received the second dose of the vaccine 10 to 20 weeks ago. This, in part, reflects the age distribution of those who are most commonly affected with S negative infections – those aged 20-39.



**Figure S2: Rate of S-gene positive and S-gene negative confirmed infections from community samples in Scotland from November 15 to December 19, 2021 by age group**

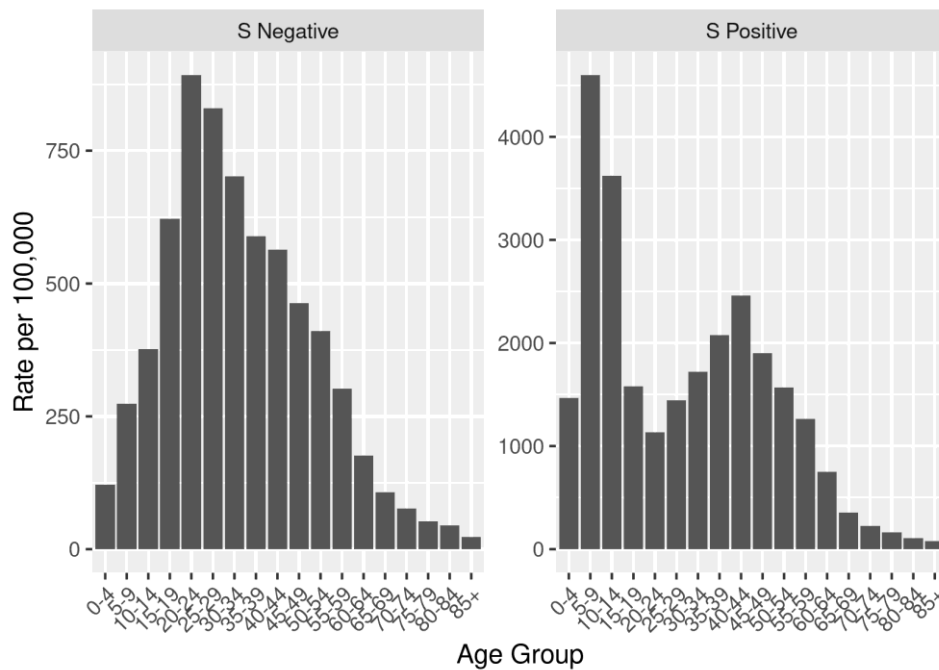

This chart shows that the age distributions of S positive and S negative infections in Scotland is quite different. The rate of S positive infections is much higher in children whereas the highest rates of S negative infections are in young adults

**Figure S3: Hospital admissions within 14 days of a positive test among individuals who tested positive in the community in Scotland from November 1, 2021 by S-gene status.**

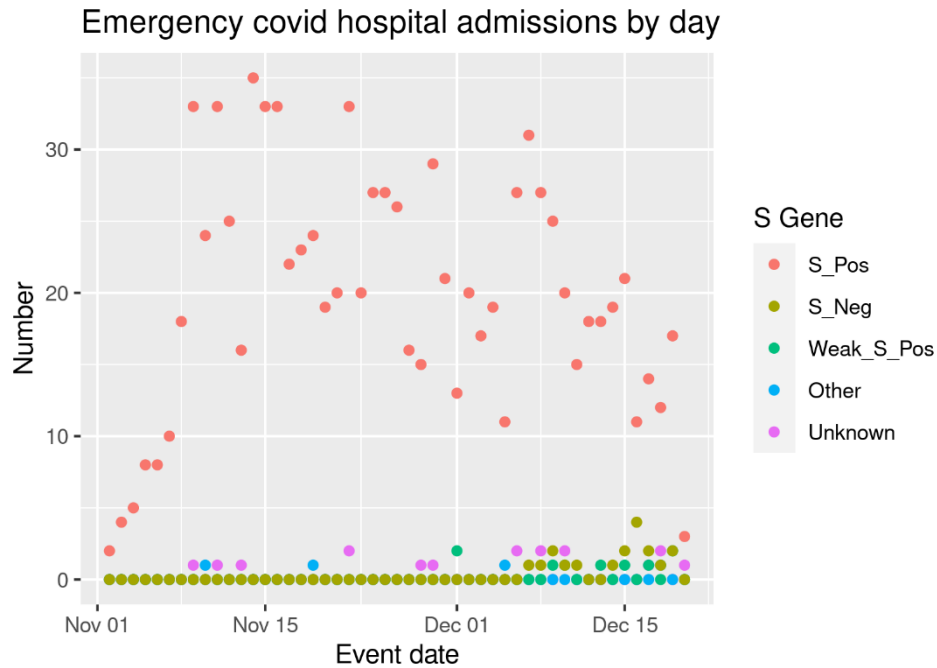

This graph counts only people who were not in hospital at the time of test. The increase in admissions at the beginning of the time period for individuals with S positive infections reflects the selection criterion of testing positive from November 1, 2021<sup>1</sup> and the time to hospital admission from testing positive. Individuals can be admitted any day following the positive test but most are admitted within 5-10 days following testing positive.

**Figure S4: Crude rates of admission to hospital within 14 days of a positive community test by age group**

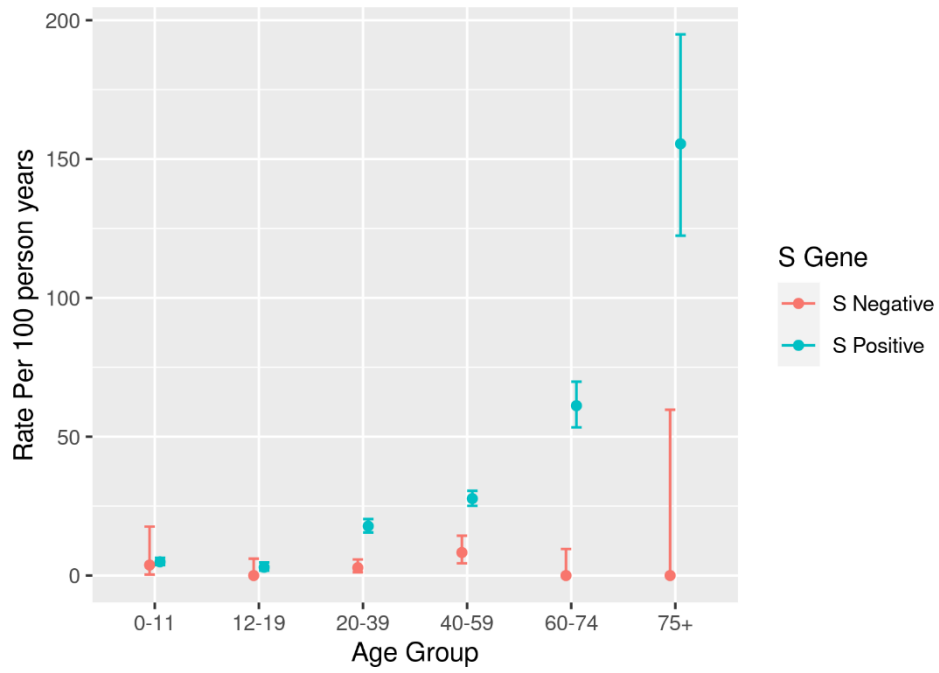

Supplement: mmc1.pdf [file mmc1.pdf]
